# Supplementary material for: Hypoxia-induced long non-coding RNA DARS-AS1 regulates RBM39 stability to promote myeloma malignancy
Source: PubMed Central journal article supplement — Haematologica. 2019 Jul 9;105(6):1630–40. doi: 10.3324/haematol.2019.218289 (PMC7271587; doi:10.3324/haematol.2019.218289), 2020-06
Supplement: 2019_218289-Disclosures_and_Contributions.pdf [file 2019_218289-Disclosures_and_Contributions.pdf]

Haematologica  
HAEMATOL/2019/218289  
Version 3

Hypoxia-induced long non-coding RNA DARS-AS1 regulates RBM39  
stability to promote myeloma malignancy

Jia Tong, Xiaoguang Xu, Zilu Zhang, Chengning Ma, Rufang Xiang, Jia  
Liu, Wenbin Xu, Chao Wu, Junmin Li, Fenghuang Zhan, Yingli Wu, and  
Hua Yan

Disclosures: none

Contributions: JT and XGX performed most of the cellular, biochemical, and animal experiments. ZLZ, CNM and RFX obtained clinical samples and the statistical analyses. JL, WBX and CW partially contributed to the biochemical and animal experiments. FHZ provided the analysis of patient prognosis based on RBM39 expression level in myeloma. JML provided the statistical support. LYW. and HY supervised the project, designed experiments, analyzed results, and wrote the paper.
